# Supplementary material
Source: PubMed Central journal article supplement (PMC11028137)
Supplement: 262_2018_2265_MOESM1_ESM.pdf [file 262_2018_2265_MOESM1_ESM.pdf]

**supplementary Table 1. Clinical characteristics of HNSCC patients.**

| Characteristic        |          | Total |
|-----------------------|----------|-------|
| Gender                | Male     | 64    |
|                       | Female   | 4     |
| Age                   | <60      | 32    |
|                       | ≥60      | 36    |
| Tumor Differentiation | Well     | 26    |
|                       | Moderate | 22    |
|                       | Poor     | 20    |
| Tumor Grade           | T1-2     | 49    |
|                       | T3-4     | 19    |
| Lymph Node Metastasis | No       | 57    |
|                       | Yes      | 11    |
| AJCC TNM Stage        | I-II     | 47    |
|                       | III-IV   | 21    |

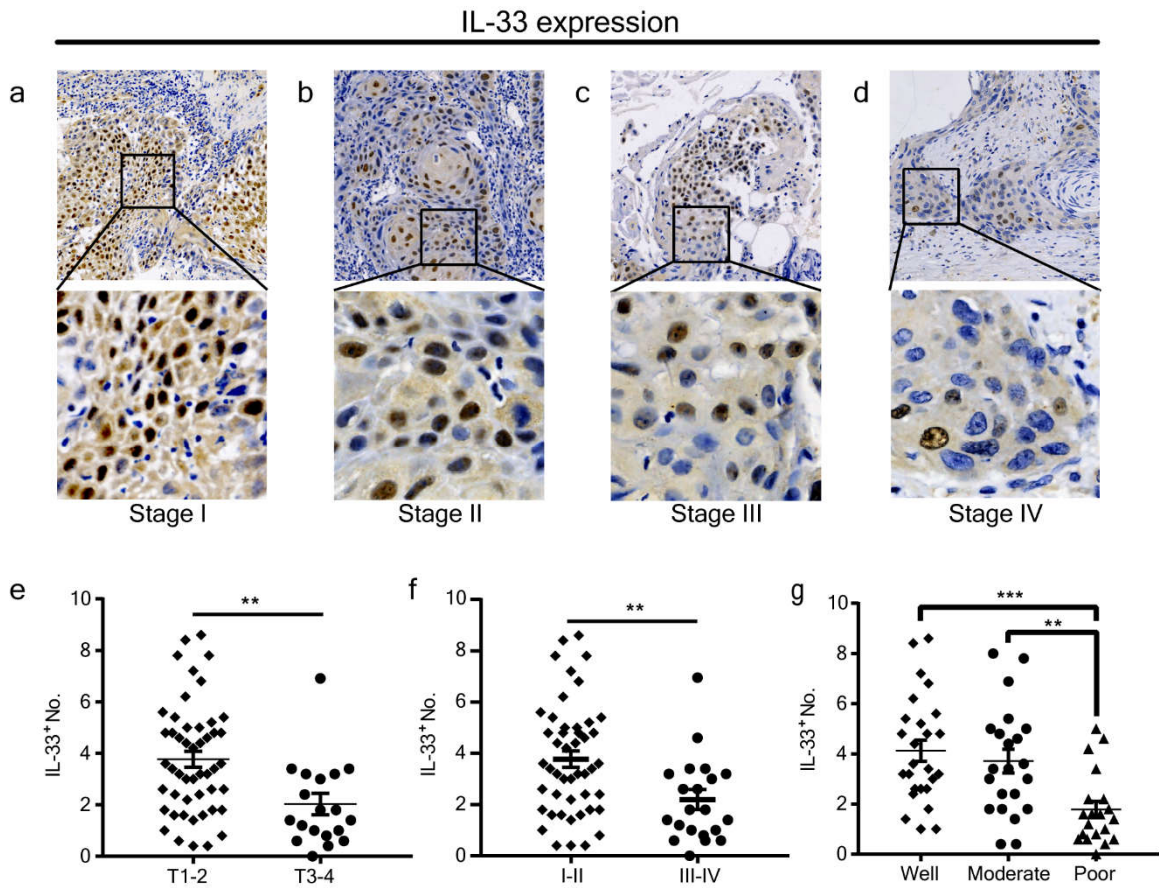

**supplementary Figure 1. Parenchymal IL-33<sup>+</sup> cells infiltration was associated with favorable prognosis in HNSCC.**

**(a-d)** Representative figures of IL-33<sup>+</sup> cells in tumor from clinical stage I to IV. **(e-f)** IL-33 expression is lower in both advanced T stage and clinical stage (**e**:  $3.78 \pm 0.30$  and  $2.032 \pm 0.42$ ; **f**:  $3.77 \pm 0.32$  and  $2.2 \pm 0.39$ ). **g** Parenchymal IL-33<sup>+</sup> cells were significantly reduced in poorly differentiated HNSCC.

\*\*p<0.01, \*\*\*p<0.001.

Gate on CD3+CD4+Cells

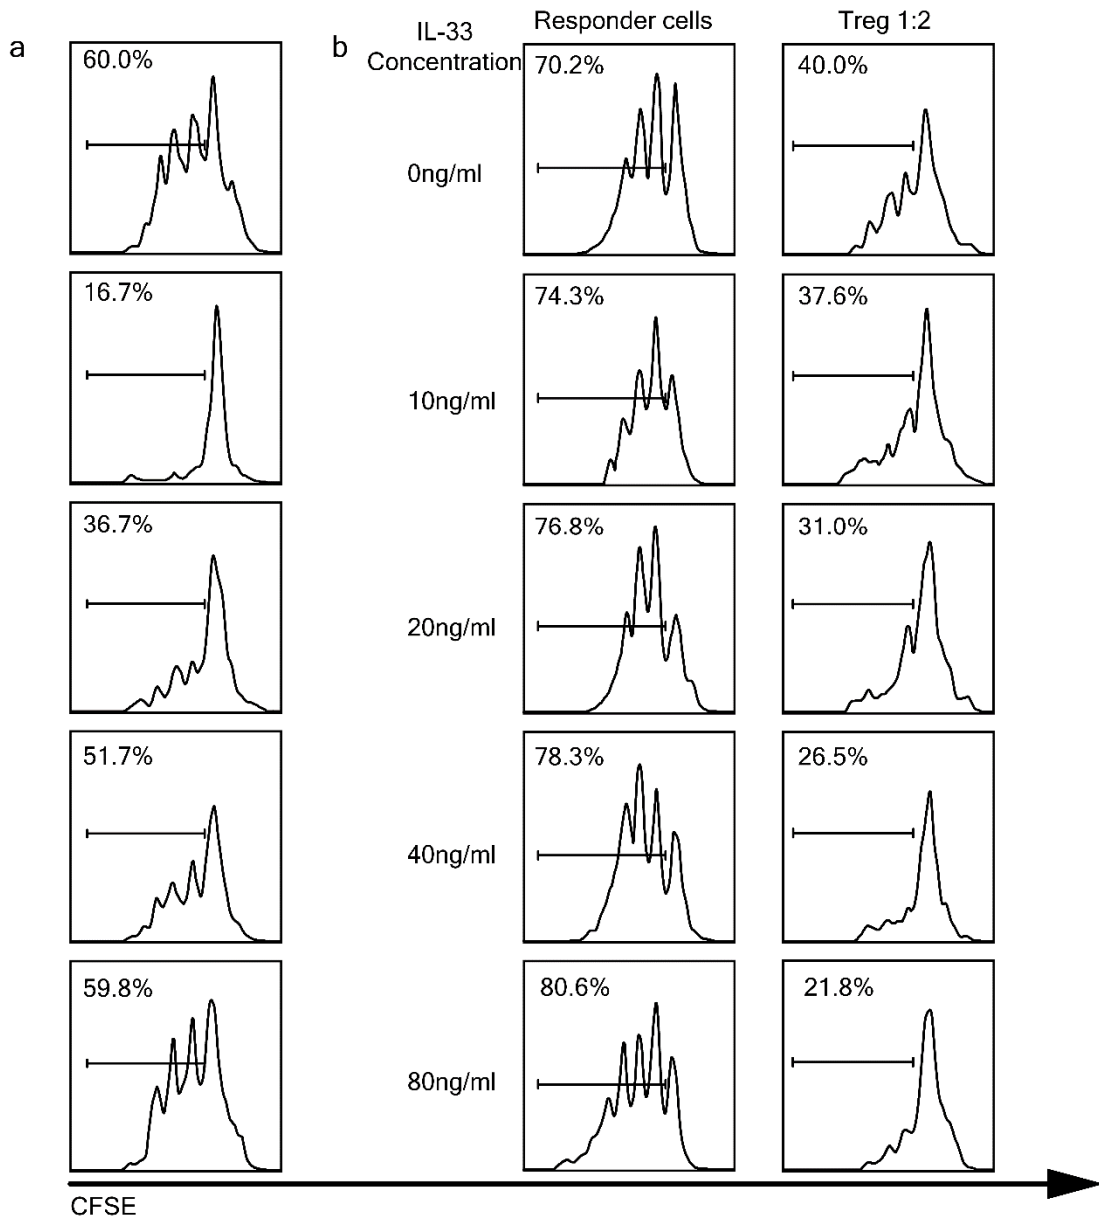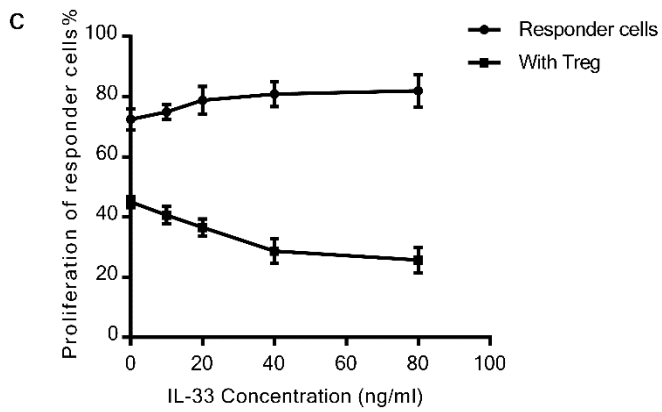

**supplementary Figure 2. IL-33 mediated Treg cells activation is dose-dependent.**

**a** The suppression of the proliferation of responder T cells under different ratio, representative figures are shown. **b** IL-33 boosts the proliferation of responder T cells alone, but also increase the immunosuppressive ability of Treg cells in a dose-dependent manner, representative figures are shown. **c** IL-33 increased the proliferation of T cells without Tregs, whereas decreased the proliferation of T cells with the presence of Tregs. Data are mean  $\pm$  SEM and are representative of three independent experiments.
